# What Maintains the Central North Pacific Genetic Discontinuity in Pacific Herring?

Ming Liu<sup>1</sup>, Longshan Lin<sup>1</sup>, Tianxiang Gao<sup>1\*</sup>, Takashi Yanagimoto<sup>2</sup>, Yasunori Sakurai<sup>3</sup>, W. Stewart Grant<sup>4</sup>

**1** Institute of Evolution and Marine Biodiversity, Ocean University of China, Qingdao, Shandong, China, **2** National Research Institute of Fisheries Science, Fisheries Research Agency, Yokohama, Kanagawa, Japan, **3** Graduate School of Fisheries Science, Hokkaido University, Hakodate, Hokkaido, Japan, **4** Alaska Department of Fish and Game, Anchorage, Alaska, United States of America

## Abstract

Pacific herring show an abrupt genetic discontinuity in the central North Pacific that represents secondary contact between refuge populations previously isolated during Pleistocene glaciations. Paradoxically, high levels of gene flow produce genetic homogeneity among ocean-type populations within each group. Here, we surveyed variability in mtDNA control-region sequences (463 bp) and nine microsatellite loci in Pacific herring from sites across the North Pacific to further explore the nature of the genetic discontinuity around the Alaska Peninsula. Consistent with previous studies, little divergence ( $\Phi_{ST} = 0.011$ ) was detected between ocean-type populations of Pacific herring in the North West Pacific, except for a population in the Yellow Sea ( $\Phi_{ST} = 0.065$ ). A moderate reduction in genetic diversity for both mtDNA and microsatellites in the Yellow Sea likely reflects founder effects during the last colonization of this sea. Reciprocal monophyly between divergent mtDNA lineages ( $\Phi_{ST} = 0.391$ ) across the Alaska Peninsula defines the discontinuity across the North Pacific. However, microsatellites did not show a strong break, as eastern Bering Sea (EBS) herring were more closely related to NE Pacific than to NW Pacific herring. This discordance between mtDNA and microsatellites may be due to microsatellite allelic convergence or to sex-biased dispersal across the secondary contact zone. The sharp discontinuity between Pacific herring populations may be maintained by high-density blocking, competitive exclusion or hybrid inferiority.

**Citation:** Liu M, Lin L, Gao T, Yanagimoto T, Sakurai Y, et al. (2012) What Maintains the Central North Pacific Genetic Discontinuity in Pacific Herring? PLoS ONE 7(12): e50340. doi:10.1371/journal.pone.0050340

**Editor:** Dirk Steinke, Biodiversity Institute of Ontario – University of Guelph, Canada

**Received:** May 26, 2012; **Accepted:** October 17, 2012; **Published:** December 28, 2012

**Copyright:** © 2012 Liu et al. This is an open-access article distributed under the terms of the Creative Commons Attribution License, which permits unrestricted use, distribution, and reproduction in any medium, provided the original author and source are credited.

**Funding:** This work was supported by the Special Fund for Agro-scientific Research in the Public Interest (No. 200903005), the National Natural Science Foundation of China (31061160187), and the Open Foundation from Ocean Fishery Science and Technology in the Most Important Subjects of Zhejiang. The funders had no role in study design, data collection and analysis, decision to publish, or preparation of the manuscript.

**Competing Interests:** The authors have declared that no competing interests exist.

\* E-mail: gaozhang@ouc.edu.cn

## Introduction

Untangling the influences that historical events and present-day processes have on phylogeographic patterns in marine species is a major focus of phylogeographic research [1]. Genetic studies show a wide range of shallow population structure that can often be related to shoreline complexity [2], ocean frontal systems [3], retentive or dispersive currents [4,5], or intrinsic biological limits on dispersal [6,7]. Marine species are often imprinted with deep structure from historical isolations. Among these are examples of abrupt phylogeographic breaks along a shoreline that appear to be unrelated to contemporary barriers to gene flow [8–10]. These population discontinuities are not always concordant with general biogeographic breaks observed in other species, and thus appear to reflect historical demography [11] or interactions between populations [12]. The extent that population boundaries reflect interactions between divergent populations within a species has not been examined in depth.

Here, we focus on a deep geographic partition between populations of Pacific herring in the central North Pacific that has previously been detected with allozyme [13,14] and mitochondrial (mt) DNA markers [15,16]. Three divergent mtDNA lineages appear in Pacific herring: one is largely restricted to the Northwestern (NW) Pacific and Bering Sea, and the other two are restricted to the Northeastern (NE) Pacific. Ocean-type herring,

which complete their life cycle in high salinity water [14], tend to show little divergence among populations within these two groups [13,14,17]. The near panmixia among ocean-type populations implies high levels of dispersal along shorelines in the NW Pacific and in the NE Pacific. Paradoxically, a sharp genetic boundary around the Alaska Peninsula separates populations in the Bering Sea from the Gulf of Alaska [13]. This boundary likely represents a post-glacial contact zone between populations isolated in southern refugia during late Pleistocene episodes of coastal glaciation [13], but the mechanisms maintaining genetic separating between groups are uncertain.

Surveys of molecular variability among populations have found only small differences between ocean-type populations within the NE and NW Pacific [13–15,18]. Nevertheless, populations with spawning-time differences from other populations [7], populations isolated in fjords [19] and populations adapted to brackish water [14] show moderate genetic differences from open-ocean herring populations. However, these populations are not common. Populations at the margins of the distribution of Pacific herring may also show genetic divergence from central populations because of geographic isolation or adaptation to peripheral environments. In the NE Pacific, the edge of the species distribution has retracted northward since the 1950 s to San Francisco Bay [16]. These populations are genetically similar to more northern populations in the NE Pacific [13,15]. Less is

known about the genetics of herring populations at the southern edge of the distribution in the NW Pacific. Herring appear episodically in the Yellow Sea about every 30 years, because of decadal shifts in temperature and productivity in the Yellow Sea [20]. These environmental shifts lead to short-term cycles of extinction and colonization [20].

The goal of the present study was to use mitochondrial (mt) DNA and microsatellite DNA markers to examine various aspects of population structure in ocean-type populations of Pacific herring across the North Pacific. These two marker types have different mutation rates and enable us to detect contemporary gene flow and deeper separations between populations. Relatively smaller mutation rates for mtDNA allow the reconstructions of population events reaching back several thousand years, and larger mutation rates for microsatellites give insights into contemporary levels of gene flow. One objective was to investigate the population structure of herring in the NW Pacific, and in particular to estimate the relationship of herring in the Yellow Sea to other NW Pacific herring. If present-day populations in the Yellow Sea were established by a small number of founders, these populations may show reduced levels of genetic diversity and departures from neutrality. A second objective was to estimate the population structure of ocean-type herring in the NW Pacific. Previous studies of mtDNA sequence variability [15] and allozymes [13,14], based on only a few samples, showed no significant differences between ocean-type populations. Here we surveyed variability at nine microsatellite loci, in addition to mtDNA control region sequences in seven samples extending over the range of the NW Pacific lineage of Pacific herring. A third objective was to investigate the contact zone between the NW and NE Pacific lineages of herring. On a large geographic scales, studies using allozyme [13,14] and mtDNA [15] show a strong genetic break between populations in the Bering Sea and the Gulf of Alaska that appears to reflect a contact zone between refuge populations isolated by Pleistocene coastal glaciations. In contrast to allozymes and mtDNA, microsatellites showed a pattern of isolation by distance, without a strong break across the Alaska Peninsula [18]. However, no NW Pacific samples were included in that study. Here we use mtDNA and microsatellite markers to further investigate this transition zone.

## Materials and Methods

### Ethics Statement

All experimental procedures involving fish were approved by the Institutional Animal Care and Use Committee of Ocean University of China (Permit Number: OUC-20120525). This study did not involve endangered or protected species and the sampling locations are not privately-owned or protected in any way.

### Sample collection

Tissue samples from 341 Pacific herring adults were collected in 2003–2010 at six locations in the NW Pacific, one location in the southeastern Bering Sea, and three locations in the NE Pacific (Table 1, Fig. 1). Muscle tissue samples were collected at YS, SH, IB, NH, AK, WK, TO and SI, and fins were collected from fish at SG and CW. A total of 341 fish from ten locations was examined for mtDNA sequence variation, and 214 fish from nine locations were screened for microsatellite DNA variation. Samples from the Strait of Georgia (SG) were excluded from the microsatellite analysis because of poor quality.

### DNA amplification

Genomic DNA was extracted following Sambrook et al. [21]. The first hypervariable segment of the mtDNA CR was amplified with the primers CP-F: 5'-ACTCCCAAAGCTAGGATTCTG-3' (forward) and CP-R: 5'-CTCAATTTGGTTGGTTCGGTTC-3' (reverse), which amplified a 480 base pair (bp) fragment. Polymerase chain reaction (PCR), purification of PCR product, and sequencing were carried out according to protocols in J.-X. Liu et al. [22]. Sequences were edited and aligned using DNASTAR (DNASTAR Inc., www.dnastar.com) and deposited in the GenBank (Accession numbers JN796250–JN796404) (Table S1).

Ten microsatellite loci were amplified with primers developed by Olsen et al. [23] and O'Connell et al. [18] (Table S2) and with the PCR conditions in Olsen et al. [23]. PCR products were separated in a 6% denaturing polyacrylamide gel and visualized with silver staining following Bassam et al. [24]. Alleles for a locus were numbered by relative electrophoretic distance [25].

**Table 1.** Summary statistics for mitochondrial DNA variability in Pacific herring.

| Location                          | Abbr. | Year | <i>N</i> | <i>n</i> | <i>S</i> | <i>h</i>      | $\Theta_{\pi}$  | $\pi$        | <i>F<sub>S</sub></i> | <i>P</i> |
|-----------------------------------|-------|------|----------|----------|----------|---------------|-----------------|--------------|----------------------|----------|
| Northwestern Pacific              |       |      |          |          |          |               |                 |              |                      |          |
| 1. Rongcheng, Yellow Sea          | YS    | 2003 | 39       | 13       | 24       | 0.908 ± 0.024 | 0.0095 ± 0.0053 | 4.51 ± 2.27  | -1.301               | 0.319    |
| 2. Shimane, Sea of Japan          | SH    | 2007 | 24       | 18       | 23       | 0.975 ± 0.019 | 0.0113 ± 0.0063 | 5.71 ± 2.80  | -8.427               | 0.002    |
| 3. Ishikari Bay, Sea of Japan     | IB    | 2005 | 24       | 12       | 16       | 0.935 ± 0.025 | 0.0106 ± 0.0059 | 5.06 ± 2.55  | -1.635               | 0.242    |
| 4. North of Hokkaido, Okhotsk Sea | NH    | 2004 | 26       | 15       | 27       | 0.945 ± 0.024 | 0.0107 ± 0.0060 | 5.11 ± 2.56  | -4.135               | 0.041    |
| 5. Akkeshi, East of Hokkaido      | AK    | 2005 | 36       | 26       | 38       | 0.975 ± 0.014 | 0.0120 ± 0.0065 | 5.71 ± 2.80  | -15.903              | <0.001   |
| 6. West Kamchatka, Okhotsk Sea    | WK    | 2007 | 29       | 19       | 24       | 0.948 ± 0.028 | 0.0109 ± 0.0061 | 5.24 ± 2.61  | -7.992               | 0.004    |
| 7. Togiak, S.E. Bering Sea        | TO    | 2007 | 30       | 14       | 33       | 0.894 ± 0.037 | 0.0120 ± 0.0066 | 5.76 ± 2.84  | -1.976               | 0.208    |
| Northeastern Pacific              |       |      |          |          |          |               |                 |              |                      |          |
| 8. Sitka, S.E. Alaska             | SI    | 2007 | 26       | 20       | 52       | 0.963 ± 0.027 | 0.0223 ± 0.0117 | 10.84 ± 5.10 | -7.654               | 0.005    |
| 9. Strait of Georgia              | SG    | 2009 | 24       | 20       | 37       | 0.978 ± 0.021 | 0.0204 ± 0.0108 | 9.90 ± 4.69  | -24.490              | <0.001   |
| 10. Coastal Washington            | CW    | 2005 | 84       | 61       | 69       | 0.980 ± 0.008 | 0.0227 ± 0.0116 | 11.02 ± 5.06 | -1.301               | 0.319    |

Sample localities, sample abbreviation, collection year, sample size (*N*), number of haplotypes (*n*), number of segregating sites (*S*), haplotype diversity (*h*, standard deviation), nucleotide diversity ( $\Theta_{\pi}$ , standard deviation; TrN model of mutation), mean number of nucleotide mismatches ( $\pi$ ), Tajima's *D*, and Fu's *F<sub>S</sub>*. doi:10.1371/journal.pone.0050340.t001



**Figure 1. Sampling locations and frequency distributions of the three major haplotype lineages in ten samples.** Sample numbers as in Table 1. Key to haplotype lineage: A = black; B = grey; C = white.  
doi:10.1371/journal.pone.0050340.g001

### MtDNA sequence analysis

Molecular diversity indices were estimated with ARLEQUIN 3.1 [26]. ModelTest 3.7 [27] indicated that the TrN+I+G model [28] nucleotide substitution model best fit the sequences with invariable sites  $I=0.60$  and gamma shape parameter  $\alpha=0.66$ . A 95% confident parsimony haplotype network was constructed with TCS 1.15 [29].

Genetic divergence between populations was estimated with an analysis of molecular variation (AMOVA) [30] using  $F_{CT}$  and  $\Phi_{CT}$  in ARLEQUIN. Several models of population structure, based on adjacent-sample pooling, were considered to assess population structure. Genetic breaks between populations were identified by finding the largest significant values of  $F_{CT}$  or  $\Phi_{CT}$  between population groups and the smallest and non-significant values of  $F_{SC}$  and  $\Phi_{SC}$  among populations within these groups.

Deviations from neutrality were tested with Fu's  $F_S$  [31], as implemented in ARLEQUIN. Nucleotide mismatch distributions (ARLEQUIN) were used to test for population growth and spatial range expansions [32] and to estimate demographic parameters representing population sizes before ( $\theta_0$ ) and after ( $\theta_1$ ) population growth, and a compound variable representing the time since population expansion,  $\tau=2ut$ , where  $u$  is the mutation rate over the whole sequence and  $t$  is the time since population growth or geographical expansion [33,34]. However, since a molecular clock calibration is uncertain, we used the mismatch distributions to compare the general demographic histories among populations.

Isolation by distance was tested by comparing standardized genetic distance values ( $F_{CT}$  and  $\Phi_{CT}$ ) between samples and geographical distance with Mantel's test for correlation between difference matrices in the online program IBDWS (isolation by distance web service at <http://ibdws.sdsu.edu/~ibdws/>) [35,36]. The probability that the correlation ( $r$ ) between genetic and geographical distances was larger than 0.0 was estimated with 1000 randomizations. Genetic distances, or geographical distances, or both, were log transformed to attempt to improve correlations. A log transformation of geographical distances tested for IBD on large geographical scales, and a log transformation of genetic distances tested for IBD at large values of genetic distance.

### Microsatellite DNA data analysis

We calculated the number of alleles, observed and expected heterozygosities with POPGENE 1.32 [37]. Fit to Hardy-Weinberg genotypic expectations (HWE) and genotypic linkage disequilibrium were tested with GENEPOP 4.0 [38] with 10 000

burn-in steps, and 500 batches of 5000 Monte Carlo Markov Chain (MCMC) steps per batch. Departures from neutrality of microsatellite loci were tested using LOSITAN. The analysis was made on two datasets. The first included the seven samples from the NW Pacific. The second was made on all nine samples from across the North Pacific. We used individual assignment tests implemented in STRUCTURE 2.1 [39] and followed Evanno et al. [40] to estimate the number of genetically discrete populations. Population groups were simulated for  $K=1$  to 9, assuming possible mixed ancestry and correlated allele frequencies, and using 1 000 000 MCMC steps, discarding the first 100 000 steps.

We used POWSIM 4.0 [41] to estimate statistical power to detect various levels of differentiation with the 10 microsatellites in Pacific herring. Burn-in consisted of 1000 steps followed by 100 batches of 1000 steps.  $X^2$  and Fisher's probabilities were used to test the significance of an  $F_{CT}$  value for each replicate run, and the proportion of significant  $F_{CT}$  values among 1000 replicate simulations yielded statistical power for a given level of divergence. Divergence among populations was modelled by allowing frequencies to drift for a given number of generations with effective population sizes ( $N_e$ ) equal to 2000 fish. The results of the simulations indicated a rapid increase in power with larger values of  $F_{CT}$  (Table 2). Significant  $F_{CT}$  values of 0.004 or larger were detected with about 90% confidence and significant values larger than  $F_{CT}=0.008$  were detected with 100% confidence.

We used several models of population structure and AMOVA in ARLEQUIN to identify genetic breaks among populations.

**Table 2. Results of simulations to test for statistical power of 10 microsatellites to detect significant genetic population structure with  $F_{CT}$  and  $X^2$  and Fisher's probabilities of testing for  $F_{CT} > 0.0$ .**

| $F_{CT}$ | $X^2$ | Fisher |
|----------|-------|--------|
| 0.001    | 0.199 | 0.199  |
| 0.002    | 0.520 | 0.518  |
| 0.004    | 0.953 | 0.909  |
| 0.008    | 1.0   | 1.0    |
| 0.016    | 1.0   | 1.0    |

doi:10.1371/journal.pone.0050340.t002



**Figure 2. Parsimony-based mitochondrial DNA haplotype networks excluding singleton haplotypes.** The sizes of open circles are proportional to haplotype frequency. Closed circles represent hypothetical but unobserved haplotypes.  
doi:10.1371/journal.pone.0050340.g002

Pairwise population  $F$ -statistics were calculated with ARLEQUIN and were used to test for a correlation between standardized values of  $F_{CT}/(1-F_{CT})$  [35] and geographical distance between sampling sites to test for isolation by distance [42]. Mantel's test for isolation by distance (IBD) among populations was performed using IBDWS [36]. The probability that a correlation was significantly larger than 0.0 was tested with 1000 randomizations. Log transformations of the variables were made to attempt to improve the correlation.

## Results

### Mitochondrial DNA variation

After a conserved 17 bp portion of the tRNA<sup>Pro</sup> gene at 5' end was removed, 463 bp CR sequences were obtained for 342 specimens. These sequences were polymorphic at 110 nucleotide sites (76 parsimony informative sites), with 93 transitions, 28 transversions and six indels, which defined 155 haplotypes (113 singletons). Haplotype diversity ranged from  $h=0.894$  (TO) to 0.980 (CW) (mean  $h=0.979$ ), and nucleotide diversity ( $\Theta_\pi$ ) ranged from 0.0098 (YS) to 0.0238 (CW) (mean  $\Theta_\pi=0.0208$ ) (Table 1). Nucleotide diversities were larger in the three coastal American samples (SI, SG and CW) south of the Alaska Peninsula than in the seven samples from the Northwestern Pacific and southeastern Bering Sea (Table 1).

The larger nucleotide diversities in the NE Pacific were due to the presence of two deeply separated mtDNA lineages. Haplotypes fell into three previously described lineages (Fig. 2). Lineage A occurred almost exclusively in the NW Pacific and Bering Sea, but with a few individuals in the Gulf of Alaska, and lineages B and C co-occurred in the NE Pacific (Fig. 1). Sequence divergences

between lineages were 1.6% (S.E. 0.6%) between A and B, 1.9% (0.6%) between A and C, and 1.8% (0.6%) between B and C. Fu's  $F_S$  was highly significant ( $P<0.001$ ) for each lineage, and was significant for all the samples, except for YS, IB, NH, TO, and CW (Table 1).

Values of  $F_{CT}$  between samples from the NW and NE Pacific varied from 0.023 to 0.064 and most were significant after Bonferroni correction (Table 3). In the NW Pacific,  $F_{CT}$  varied from 0.007 to 0.059 between samples, and 3 of the 6 comparisons involving YS were significant. None of the remaining comparisons was significant in the NW Pacific, nor in the NE Pacific. All of the pairwise values of  $\Phi_{ST}$  between NW Pacific and NE Pacific samples were significant ( $\Phi_{CT}=0.331-0.459$ ), and most of the comparisons involving YS were significant ( $\Phi_{CT}=0.039-0.108$ ), except between YS and AK. Two comparisons, YS-NH and YS-TO, were not significant after Bonferroni correction.

An AMOVA of haplotype variability among samples yielded an  $F_{CT}=0.029$  ( $P<0.001$ ) overall, but divergence was much larger,  $\Phi_{CT}=0.297$  ( $P<0.001$ ), when divergence between haplotypes was considered (Table 4). This diversity was first partitioned into two groups, corresponding to the major genetic discontinuity between populations, and this yielded significant, or nearly significant, statistics between the two groups ( $F_{CT}=0.029$ ,  $P=0.008$ ;  $\Phi_{CT}=0.420$ ,  $P=0.053$ ). The AMOVA for the three NE Pacific samples, detected no significant divergence among three samples extending from Sitka, Alaska to Washington ( $F_{CT}=-0.002$ ,  $P=0.638$ ;  $\Phi_{CT}=0.021$ ,  $P=0.053$ ).

In the NW Pacific, significant divergence was detected among the 7 samples extending from the Yellow Sea to the southeastern Bering Sea ( $F_{CT}=0.019$ ,  $P=0.0001$ ;  $\Phi_{CT}=0.027$ ,  $P=0.002$ ); however, none of the  $F_{CT}$  and  $\Phi_{CT}$  values between adjacent

**Table 3.** Pairwise  $F_{CT}$  (below diagonal) and  $\Phi_{CT}$  (above diagonal) with the TrN model of mutation between samples of Pacific herring.

|    | YS           | SH           | IB           | NH           | AK           | WK           | TO           | SI           | SG           | CW           |
|----|--------------|--------------|--------------|--------------|--------------|--------------|--------------|--------------|--------------|--------------|
| YS |              | <b>0.081</b> | <b>0.097</b> | 0.039        | 0.014        | <b>0.108</b> | <b>0.051</b> | <b>0.459</b> | <b>0.372</b> | <b>0.400</b> |
| SH | 0.023        |              | 0.004        | -0.001       | 0.010        | 0.017        | 0.000        | <b>0.433</b> | <b>0.353</b> | <b>0.385</b> |
| IB | <b>0.046</b> | 0.004        |              | 0.025        | 0.023        | 0.065        | 0.011        | <b>0.438</b> | <b>0.358</b> | <b>0.384</b> |
| NH | 0.017        | -0.006       | 0.013        |              | -0.018       | -0.009       | -0.015       | <b>0.432</b> | <b>0.347</b> | <b>0.382</b> |
| AK | <b>0.034</b> | 0.005        | 0.020        | -0.007       |              | 0.019        | -0.004       | <b>0.429</b> | <b>0.346</b> | <b>0.385</b> |
| WK | <b>0.059</b> | 0.003        | 0.026        | 0.006        | 0.007        |              | -0.004       | <b>0.429</b> | <b>0.365</b> | <b>0.400</b> |
| TO | 0.033        | 0.017        | 0.029        | -0.003       | 0.021        | 0.024        |              | <b>0.416</b> | <b>0.331</b> | <b>0.373</b> |
| SI | <b>0.058</b> | <b>0.024</b> | <b>0.043</b> | <b>0.039</b> | <b>0.024</b> | <b>0.037</b> | <b>0.064</b> |              | 0.014        | -0.003       |
| SG | <b>0.058</b> | 0.025        | <b>0.042</b> | 0.036        | <b>0.026</b> | 0.037        | 0.056        | -0.008       |              | 0.043        |
| CW | <b>0.055</b> | <b>0.023</b> | <b>0.041</b> | <b>0.037</b> | <b>0.023</b> | <b>0.035</b> | <b>0.060</b> | -0.001       | -0.002       |              |

Bold values are significant after Bonferroni adjustment of rejection probability.  
doi:10.1371/journal.pone.0050340.t003

groups was significant (Table 4). Nevertheless, most values of  $F_{SC}$  and  $\Phi_{SC}$  in these comparisons were significant, indicating fine-scale differences among samples that were not apparent when samples were pooled for regional comparisons. Tests for IBD were not significant for either  $F_{CT}/(1-F_{CT})$  ( $P=0.125$ ) or  $\Phi_{CT}/(1-\Phi_{CT})$  ( $P=0.352$ ) (Fig. 3a, b). Log transformations of genetic distance, geographical distance, or both, did not improve the correlations.

Additional analyses of the mtDNA sequences provided insights in the historical demographics of Pacific herring populations. The shapes of the sequence mismatch distributions were unimodal in YS and SH, but tended to be multimodal in more northern samples (IB, AK, NH, WK, TO) (Fig. 4). However, none of the distributions deviated from an expansion model. The sudden population expansion model could not be distinguished from the spatial population expansion model. The average number of mismatches among samples ranged from 4.43 (YS) to 5.64 (AK) in the NW Pacific, but from 9.29 (SG) to 10.34 (CW) in the NE Pacific (Table 5). However, the samples from the NE Pacific

encompassed two haplotype lineages that, when analyzed together, produced larger estimates of demographic parameters than for individual lineages. Only the sample size for CW was large enough to split the sample into separate lineages for additional analysis. The mismatch distributions for lineages B and C in CW were unimodal (Fig. 5); however, the mean number of mismatches was somewhat larger in lineage C ( $\pi=7.30$ ) than in lineage B ( $\pi=5.88$ ). Not all of the tests for neutrality were significant, even though most of the mismatch distributions were unimodal, indicating recent population expansions.  $F_S$  was significant in samples from SH, NH, AK and WK in the NW Pacific, and in samples SI and SG in the NE Pacific.

#### Microsatellite variation

Eight microsatellite loci developed for Pacific herring, and two loci developed for the sister species Atlantic herring, *C. harengus*, were used to estimate divergences between populations. The average number of alleles per locus ( $A$ ) over samples ranged from 2.2 alleles

**Table 4.** AMOVAs of models of population structure based on mitochondrial DNA frequencies ( $F_{CT}$ ) and TrN distances ( $\alpha=0.6$ ) between haplotypes ( $\Phi_{CT}$ ) in samples of Pacific herring.

| YS  | SH  | IB  | NH  | AK  | WK  | TO  | SI  | SG  | CW  | $F_{CT}$ | $P$     | $F_{SC}$ | $P$    | $F_{ST}$ | $P$    | $\Phi_{CT}$ | $P$    | $\Phi_{SC}$ | $P$    | $\Phi_{ST}$ | $P$    |
|-----|-----|-----|-----|-----|-----|-----|-----|-----|-----|----------|---------|----------|--------|----------|--------|-------------|--------|-------------|--------|-------------|--------|
| [*] | *   | *   | *   | *   | *   | *   | *   | *   | *   | 0.029    | <0.001  | -        | -      | -        | -      | 0.297       | <0.001 | -           | -      | -           | -      |
| [*] | *   | *   | *   | *   | *   | *   | [*] | [*] | [*] | 0.029    | 0.0077  | 0.013    | 0.0004 | 0.042    | <0.001 | 0.420       | 0.053  | 0.019       | 0.003  | 0.431       | <0.001 |
| [*] | *   | *   | *   | *   | *   | [*] | [*] | [*] | [*] | 0.012    | 0.069   | 0.022    | <0.001 | 0.034    | <0.001 | 0.286       | 0.012  | 0.136       | <0.001 | 0.383       | <0.001 |
| [*] | *   | *   | *   | *   | *   | [*] | [*] | [*] | [*] | 0.026    | 0.0049  | 0.012    | 0.0002 | 0.038    | <0.001 | 0.375       | 0.005  | 0.023       | <0.001 | 0.389       | <0.001 |
| -   | -   | -   | -   | -   | -   | -   | [*] | [*] | [*] | -0.002   | 0.638   | -        | -      | -        | -      | 0.021       | 0.053  | -           | -      | -           | -      |
| [*] | *   | *   | *   | *   | *   | [*] | -   | -   | -   | 0.019    | 0.00014 | -        | -      | -        | -      | 0.027       | 0.002  | -           | -      | -           | -      |
| [*] | [*] | [*] | [*] | [*] | [*] | [*] | -   | -   | -   | 0.020    | 0.097   | 0.008    | 0.089  | 0.028    | 0.0001 | 0.022       | 0.240  | 0.014       | 0.101  | 0.036       | 0.002  |
| [*] | *   | *   | *   | *   | *   | [*] | -   | -   | -   | -0.0005  | 0.572   | 0.019    | 0.0002 | 0.020    | 0.0001 | -0.022      | 0.715  | 0.033       | 0.001  | 0.012       | 0.002  |
| [*] | *   | *   | *   | [*] | [*] | [*] | -   | -   | -   | 0.008    | 0.380   | 0.023    | 0.009  | 0.031    | 0.002  | 0.002       | 0.478  | 0.019       | 0.0007 | 0.021       | 0.0001 |
| [*] | *   | *   | [*] | [*] | [*] | [*] | -   | -   | -   | 0.003    | 0.315   | 0.018    | 0.001  | 0.021    | 0.0003 | -0.003      | 0.655  | 0.029       | 0.003  | 0.026       | 0.002  |
| [*] | *   | [*] | [*] | [*] | [*] | [*] | -   | -   | -   | 0.007    | 0.087   | 0.016    | 0.004  | 0.022    | 0.0002 | 0.005       | 0.340  | 0.024       | 0.008  | 0.029       | 0.002  |
| [*] | [*] | [*] | [*] | [*] | [*] | [*] | -   | -   | -   | 0.009    | 0.095   | 0.015    | 0.005  | 0.024    | 0.0002 | 0.006       | 0.428  | 0.024       | 0.010  | 0.006       | 0.002  |
| [*] | [*] | [*] | [*] | [*] | [*] | [*] | -   | -   | -   | 0.024    | 0.141   | 0.011    | 0.023  | 0.035    | 0.001  | 0.048       | 0.147  | 0.009       | 0.168  | 0.057       | 0.002  |

Location abbreviations as in Table 1.  
doi:10.1371/journal.pone.0050340.t004



**Figure 3. Pairwise estimates of genetic distance and geographical distance in Pacific herring.** a) Comparison of pairwise control region mitochondrial DNA  $F_{ST}/(1-F_{ST})$  and geographical distance;  $r=0.428$  ( $P=0.125$ ). b) Comparison of pairwise control region mitochondrial DNA  $\Phi_{ST}/(1-\Phi_{ST})$  and geographical distance;  $r=0.057$  ( $P=0.352$ ). c) Comparison of pairwise  $F_{ST}/(1-F_{ST})$  based on nine microsatellite loci and geographic distance;  $r=0.664$  ( $P=0.001$ ). doi:10.1371/journal.pone.0050340.g003

for *Cpa 110* to 13.6 for *Cha 17* (Table S2). Heterozygosities were lower on average among samples from the NW Pacific ( $H_E = 0.672-0.807$ ) than among those from the NE Pacific ( $H_E = 0.792-0.811$ ). No geographical trend appeared overall in the levels of microsatellite diversity. However, the lowest levels of diversity appeared in the sample from the Yellow Sea. Ten of 100 locus-by-population tests exhibited significant departures from HWE with heterozygote excess, but none remained significant after correction for multiple tests. Locus *Cpa110* was excluded from further analysis because significant linkage disequilibrium appeared between *Cpa110* and *Cpa108*, *Cpa110* and *Cha17* over all populations.

The LOSITAN analysis for the seven samples from the NW Pacific detected significant departures for *Cpa111* and *Cpa102* that indicate possible directional selection (Fig. 6a). Divergence was greater than expected for a given level of heterozygosity for these loci. In contrast, *Cpa114* showed significantly less divergence than expected, a condition that may be due to balancing selection. When the analysis was performed on all nine samples from across the North Pacific (Fig. 6b), loci *Cpa111* and *Cpa102* again showed

departures from neutrality, as did locus *Cpa108*, indicating the potential effect of directional selection. *Cpa114* and *Cpa101* both exhibited less divergence than expected, and may show the possible results of balancing selection.

STRUCTURE was used to test for population structure assuming one ( $K=1$ ) to nine ( $K=9$ ) population groups. The largest  $\Delta K$  appeared under the assumption of two groups. This analysis showed a large genetic discontinuity between NW Pacific and NE Pacific populations, but unexpectedly placed the sample from TO (eastern Bering Sea) into the NE Pacific population group (Fig. 7a). Under the assumption of three groups, the TO sample represented a third group distinct from both the NW and NE Pacific population groups (Fig. 7b).

Tests for divergence between populations, based on the ten microsatellite loci, indicated that all of the pairwise values of  $F_{CT}$  were significant, except for three comparisons (SH-AK, YS-WK, AK-WK) (Table 6). Divergences ( $F_{CT}$ ) ranged from 0.018 to 0.084 between the six samples from the NW Pacific. Divergences between samples from the NW and NE Pacific were generally larger, ranging from 0.070 to 0.168. In the NE Pacific, a small  $F_{CT}$  value (0.036) was observed between SI and CW (Table 6). An AMOVA of the nine samples yielded an overall  $F_{CT} = 0.073$  ( $P<0.001$ ) (Table 7). The partition of samples into two geographic groups, the NW Pacific group (including YS, SH, IB, NH, AK, WK) and the NE Pacific group (including TO, SI, CW), yielded the largest  $F_{CT}$  (0.057,  $P=0.011$ ) and the smallest  $F_{SC}$  (0.045,  $P<0.001$ ). The significant  $F_{SC}$  value also indicated differences within the two groups. When TO was separated from NE Pacific group,  $F_{CT}$  was also large and significant ( $F_{CT} = 0.046$ ,  $P=0.004$ ). This echoes the results of the STRUCTURE analysis for  $K=3$ . Less divergence was found between TO and the two samples from NE Pacific group than between TO and the six samples from NW Pacific group (Table 7). A significant correlation between genetic  $F_{CT}/(1-F_{CT})$  and geographical distance appeared between samples in the NW Pacific ( $r=0.625$ ,  $P=0.043$ ) and across the whole geographical range ( $r=0.664$ ,  $P<0.001$ , Fig. 3c).

## Discussion

The results of this study provide insights into two general features of Pacific herring population structure. First, our estimates of population structure in the western North Pacific with control region mtDNA sequences and microsatellites show minimal population structure, except for the divergence of Yellow Sea populations from other NW Pacific herring populations. Second, our results for mtDNA confirm the presence of a genetic discontinuity between the eastern Bering Sea and Gulf of Alaska populations of Pacific herring. However, microsatellite markers show a discordant biogeographic pattern from mtDNA markers, in that Eastern Bering Sea herring are more similar to populations in the Gulf of Alaska than to NW Pacific populations.

Before discussing these findings in detail, we mention two caveats. First, even though sample sizes for microsatellites were small, these sample sizes were still large enough and the microsatellite marker polymorphic enough to provide power to detect population structure as low as  $F_{CT} = 0.004$  about 90% of the time. This level of divergence is much smaller than the level of divergence between the NW Pacific and NE Pacific genetic groups, and hence our results can provide further insights into the nature of the genetic discontinuity across the North Pacific. A second caveat is that, although we sampled ocean-type herring at several locations in the NW Pacific, we had fewer samples from the NE Pacific. Hence, our focus is on estimating population structure



**Figure 4. Observed (vertical bars) mtDNA control region mismatch distributions in Pacific herring.** Curve represents the expected mismatch distributions under the sudden expansion model. Sample numbers as in Table 1. doi:10.1371/journal.pone.0050340.g004

in the NW Pacific. Nevertheless, our array of samples allows us to further examine the genetic discontinuity across the N Pacific.

**Northwestern Pacific herring**

Several oceanic and biological traits potentially influence contemporary levels of population structure. Shoreline complexity on regional scales may isolate populations. Semi-enclosed Okhotsk and Japan seas, numerous island archipelagos and peninsulas, such as the Korean Peninsula, potentially act as barriers to dispersal between populations. The attachment of early embryonic stages to kelps and sessile invertebrates can also reduce dispersal [43]. After hatching, larval dispersal is influenced by local current patterns, which can be dispersive or retentive, depending on inshore current

systems. Juveniles usually move offshore after their first summer but recruit later into the adult population [44]. Given these restrictions on dispersal, we would expect to find at least some genetic differences between ocean-type herring populations. However, our results detected only small amounts of population structure among populations of ocean-type herring in the western North Pacific.

In our study, the overall AMOVAs for both mtDNA ( $F_{CT} = 0.019, P = 0.0001; \Phi_{CT} = 0.027, P = 0.002$ ) and microsatellites ( $F_{CT} = 0.053, P < 0.001$ ) showed significant differences among populations in the NW Pacific, but particular comparisons between population groups did not show a clear geographical patterns. Nevertheless, isolation by distance (IBD) was detected for microsatellites ( $r = 0.625, P = 0.04$ ), but was absent for mtDNA ( $r = 0.428, P = 0.125$ ) and  $\Phi_{CT}$  ( $r = 0.057, P = 0.351$ ). This contrast may be due to differences in the mutation rates between the two markers. The larger mutation rates in microsatellites may allow the detection of short-term isolations between populations. For example, the seasonal movement of herring from offshore overwintering areas to inshore spawning areas [44] tends to isolate populations to some extent on short time scales, and this isolation is sufficient to lead to IBD for microsatellites. The geographical scale of IBD is expected to be large, because geographical scales of seasonal migration pathways can be on the order of hundreds of kilometers [45].

Genetic differences among populations appear to be due in part to isolation spawning-time differences among populations and because of adaptive responses to local habitat conditions [7,17,19]. Geographic differences in morphometric and meristic variables [44,46,47] and in otolith elemental compositions [48] among populations support the hypothesis of adaptive responses to local environments and short-term isolation between populations. On longer time scales, shifts in annual migration patterns in response to ocean-climate variability leads to mixing between herring aggregations [45,49,50]. This mixing tends to homogenize the frequencies of markers, such as mtDNA, with relatively smaller mutation rates [11].

The sample from the Yellow Sea was drawn from Pacific herring living at the edge of the species' distribution. These fish had marginally lower genetic diversities for both mtDNA ( $\Theta_{\pi} = 0.0095$  vs  $\Theta_{\pi} = 0.0107-0.0120$ ) and microsatellite ( $H_E = 0.672$

**Table 5. Estimates of demographic parameters from control region mtDNA mismatch distributions in samples of Pacific herring.**

| Sample | Sudden population expansion |        |            |            | Spatial population expansion |          |        |
|--------|-----------------------------|--------|------------|------------|------------------------------|----------|--------|
|        | Mean                        | T      | $\Theta_0$ | $\Theta_1$ | Mean                         | $\Theta$ | M      |
| YS     | 4.43                        | 5.020  | 0.000      | 15.300     | 5.780                        | 0.001    | 11.328 |
| SH     | 5.58                        | 4.290  | 1.896      | 58.359     | 3.974                        | 2.140    | 53.888 |
| IB     | 5.21                        | 5.266  | 1.287      | 17.368     | 3.993                        | 2.329    | 11.721 |
| NH     | 5.09                        | 3.613  | 1.893      | 92.344     | 3.644                        | 1.726    | 23.094 |
| AK     | 5.64                        | 3.654  | 2.208      | 9999       | 3.711                        | 2.110    | 63.609 |
| WK     | 5.30                        | 4.293  | 1.454      | 40.938     | 4.002                        | 1.584    | 21.217 |
| TO     | 5.55 <sup>a</sup>           | 4.965  | 0.954      | 19.473     | 4.533                        | 0.971    | 7.900  |
| SI     | 10.19                       | 10.707 | 1.000      | 38.092     | 8.154                        | 3.838    | 23.095 |
| SG     | 9.29                        | 13.344 | 0.014      | 24.702     | 5.005                        | 7.224    | 55.805 |
| CW     | 10.34                       | 7.861  | 4.479      | 62.148     | 6.768                        | 5.511    | 44.238 |
| CW-B   | 5.88                        | 7.000  | 0.001      | 47.812     | 6.808                        | 0.029    | 37.361 |
| CW-C   | 7.30                        | 7.982  | 0.000      | 62.656     | 7.771                        | 0.027    | 20.843 |

<sup>a</sup>Significant deviation from sudden population expansion model ( $P < 0.05$ ). CW-B represent the individuals belong to lineage B, and CW-C represent the ones belong to lineage C. doi:10.1371/journal.pone.0050340.t005



**Figure 5. Observed mismatch distributions of control region mtDNA haplotypes in Pacific herring from Coastal Washington.** (a) mismatch distribution of haplotypes including lineages B and C. (b) mismatch distribution of haplotypes including lineages B. (c) mismatch distribution of haplotypes including lineages C. doi:10.1371/journal.pone.0050340.g005

vs  $H_E = 0.736\text{--}0.811$ ). No significant mtDNA differentiations were detected among different samples in previous study [51] indicating the populations in the Yellow Sea were likely a single panmictic stock. The lower genetic diversity may reflect population bottlenecks from environmental variability at the edge of the species' distribution [52]. Population oscillations can lead to the loss of genetic variability, depending on the level of dispersal from central populations [53]. Pacific herring appear episodically in the Yellow Sea about every 30 years [20,51] and the low level of differentiation from other NW Pacific populations may be due to a recent colonization of the Yellow Sea.

### Historical demography

Pleistocene glaciations produced coastal glaciers and lower sea levels [54,55] that would have had a profound influence on the distributions and abundances of Pacific herring populations. Most of our samples were taken from areas that only recently have been available for the shallow-water populations of herring, and, hence, these populations have colonized northern areas since the last glacial maximum about 18 thousand years ago. The mismatch distribution for each of the samples shows a unimodal distribution indicating recent population growth, but the analyses could not distinguish between the geographic expansion of a stable population or population growth. Given the historical setting, an expansion of a refuge population into newly opened northern habitats is the most likely interpretation of the unimodal mismatch distributions.

The lack of an accurate mutation rate prevents us from making a molecular-clock calibration to time the population expansion. However, the uniformity in the mean number of mismatches among NW Pacific populations ( $\pi = 4.51\text{--}5.76$ ) indicates that post-glacial population expansions occurred at about the same time. In the NE Pacific, however, mismatches for the lineages B and C were larger than those for NW Pacific populations ( $\pi = 9.90\text{--}11.02$ ), suggesting either an earlier expansion, or differences in metapopulation structure between the two regions. The NW Pacific experiences greater annual and decadal swings in climate and temperature than does the NE Pacific [56–58]. Both smaller allozyme and microsatellite diversity may result from a greater incidence of local extinction and colonization in the NW Pacific. Tests for neutrality with  $F_S$  generally indicated excesses of low-frequency haplotypes that are also consistent with recent population expansions.

### Phylogeographic break across secondary contact zone

Three deep mtDNA lineages occur in Pacific herring that show control-region sequence divergences of 1.5% to 1.9% from one another [15,16]. Divergences between A in the NW Pacific, and B and C in the NE Pacific likely arose during geographical isolations during Pleistocene glaciations of two groups across the North Pacific [15,16]. However, the origins of the co-distributed lineages B and C are controversial [15,16], but are likely due to lineage sorting in a large population and not due to divergence in isolation [16]. Lineage A is largely limited to the NW Pacific, but a few fish bearing A-lineage haplotypes have been found in the Gulf of Alaska ([15], this study). Lineages B and C co-occur in the NE Pacific, but also appear in small numbers in the eastern Bering Sea. These 'stray' haplotypes likely represent long-distance dispersals.

Previous studies of allozyme markers showed a strong genetic discontinuity between NW and NE Pacific populations [13,14] that is mirrored by mtDNA markers [15,16]. Microsatellite markers, on the other hand, tend to show small amounts of contemporary population structure [7,17–19]. The dynamics of the suture zone between the NW (phylogroup A) and NE (phylogroups A and B) Pacific groups are not well known, in part, because of the difficulty in sampling remote rock shores along the Alaska Peninsula that are exposed to the open ocean. Pacific herring have been sampled off Kodiak Island in two studies [13,18] and in the northern part of Bristol Bay in the eastern Bering Sea ([7,13,15], this study). Allozyme and mtDNA markers show an abrupt haplotype frequency shift between Kodiak Island and Bristol Bay. In the allozyme study, a small sample ( $n=21$ ) from the southern shore of the Alaska Peninsula showed intermediate between the two regional groups [13]. While this sample was small, 11 polymorphic allozyme loci did not show heterozygote deficits that would indicate Wahlund's effect and the lack of interbreeding between fish from the two groups.

The geographic pattern across the North Pacific for microsatellites in the study of O'Connell et al. [18] and our study differ from that for allozymes and mtDNA. The results of our study shows that the sample from the eastern Bering Sea was more similar to Pacific herring in the Gulf of Alaska than to NW Pacific herring. The results of O'Connell et al. [18] also showed a close relationship between Bering Sea and NE Pacific populations of herring. They found a pattern of isolation by distance among seven samples from the Bering Sea and Gulf of Alaska, but without a genetic discontinuity along shores of the Alaska Peninsula. However, in that study, samples from the NW Pacific were not included, so the amount of differentiation from Asian Pacific herring could not be estimated.



**Figure 6. Distribution of 10 microsatellite loci along  $F_{ST}$  and  $H_e$  axes and 95% confidence interval.** (a) LOSITAN analysis of seven samples from the NW Pacific. (b) LOSITAN analysis of nine samples across the North Pacific. The upper and lower shaded areas represent confidence intervals for expected distributions of loci under selection. doi:10.1371/journal.pone.0050340.g006

Molecular genetic differences between the two large groups coincide with morphological and ecological differences between the two groups. Hay et al. [20] summarized the results for age-specific growth, recruitment, and population diversity for Pacific herring across the North Pacific and found differences between populations across the North Pacific. NE Pacific herring (Gulf of Alaska to California) are generally smaller, grow more slowly, and reach lower asymptotic weights than NW Pacific herring. In the NE Pacific, size-at-age differs to a small extent with latitude, but this difference is slight compared to the large west-east difference. The sizes of Pacific herring in the NW Pacific are substantially larger than the sizes of NE Pacific herring at all ages. However, Pacific herring in the eastern Bering Sea are intermediate between NW and NE Pacific herring.

The reason for the differences in growth and asymptotic sizes between populations in the NW and NE Pacific are uncertain. Hay et al. [20] postulated that these differences were adaptive and had evolved in response to ecosystem differences in local prey that influence trophic ecology, to the intensity of competition for food, and to different climatic regimes on either side of the Pacific [56,58]. If so, then it is enigmatic that the biological differences between the western and eastern Pacific far exceed within-region, north-south differences (at least in the NE Pacific where data are available) in populations that experience as much environmental variability as western and eastern populations [20]. If these biological differences are genetically based, it may be misguided to search for associations of biological differences in contemporary habitats, as the regional differences likely evolved in isolation under different ocean regimes during the Pleistocene ice ages.

The strong mtDNA divergence between NW and NE Pacific populations, together with biparentally inherited microsatellites provide clear dispersal markers. The appearance of fish bearing mtDNA lineage A in the NE Pacific and fish with lineages B or C in the NW Pacific can be taken as evidence for long-distance dispersal across the secondary contact zone. However, the

temporal scale of this dispersal is difficult to gauge, but dispersal likely occurs in a stepping-stone fashion over generations. Both males and females carry maternal mtDNA, but only females pass their mtDNA on to offspring, so mtDNA lineages in dispersing males die out in one generation. Dispersing females, however, can pass on out-of-basin haplotypes to their offspring. Future analysis of northern populations by sex may give insights into the frequency of long-distance dispersals and may provide insights into the reproductive successes of migrants.

Several species show abrupt genetic discontinuities between populations [3,8–10,59] that have variously been attributed to



**Figure 7. Results of STRUCTURE analysis of 10 microsatellite loci in Pacific herring.** Vertical lines are proportional to the probability of individual membership in simulated cluster. (a)  $K=2$ , (b)  $K=3$ . doi:10.1371/journal.pone.0050340.g007

**Table 6.** Pairwise values of  $F_{CT}$  based on nine microsatellite loci in Pacific herring.

|    | YS           | SH           | IB           | NH           | AK           | WK           | TO           | SI           |
|----|--------------|--------------|--------------|--------------|--------------|--------------|--------------|--------------|
| SH | <b>0.078</b> |              |              |              |              |              |              |              |
| IB | <b>0.084</b> | <b>0.075</b> |              |              |              |              |              |              |
| NH | <b>0.082</b> | <b>0.056</b> | <b>0.054</b> |              |              |              |              |              |
| AK | <b>0.052</b> | 0.036        | <b>0.045</b> | <b>0.038</b> |              |              |              |              |
| WK | 0.032        | <b>0.045</b> | <b>0.047</b> | <b>0.030</b> | 0.018        |              |              |              |
| TO | <b>0.132</b> | <b>0.117</b> | <b>0.123</b> | <b>0.070</b> | <b>0.093</b> | <b>0.069</b> |              |              |
| SI | <b>0.143</b> | <b>0.112</b> | <b>0.095</b> | <b>0.077</b> | <b>0.089</b> | <b>0.077</b> | <b>0.078</b> |              |
| CW | <b>0.168</b> | <b>0.125</b> | <b>0.104</b> | <b>0.078</b> | <b>0.096</b> | <b>0.108</b> | <b>0.105</b> | <b>0.036</b> |

Bold values indicate significance ( $P < 0.05$ ) after Bonferroni correction of probabilities.  
doi:10.1371/journal.pone.0050340.t006

physical barriers to dispersal, habitat discontinuity, weak dispersal ability, selection and secondary contact. While secondary contact between previously isolated populations is a likely explanation for the origins of the genetic discontinuity in Pacific herring [13,15,16], additional factors must be at play in maintaining the genetic discontinuity between groups. The evolutionarily rapid post-glacial expansion of herring populations, low levels of differentiation among populations and the observation of displaced mtDNA haplotypes indicate that long-distance dispersals can be a feature of Pacific herring biology. It is puzzling then why a sharp genetic boundary still exists between NW and NE Pacific herring.

Several mechanisms have been postulated to account for abrupt genetic discontinuities along more or less continuous marine habitats. One is that established populations resist the immigration of individuals from other populations through competitive exclusion based on adaptive differences between populations [12], such as size, which may reflect other adaptive differences between these two groups [20]. It is uncertain, however, whether the intermediate sizes of Bering Sea herring reflect mixing and hybridization between the two regional groups, or whether the Bering Sea environment itself selects for intermediate-sized herring. On the one hand, the distributions of mtDNA lineages indicate a lack of mixing, but the intermediate position of Bering

Sea herring between NW and NE Pacific herring depicted with microsatellites supports the mixing and hybridization hypothesis.

Discordance between mtDNA and nuclear markers in a secondary contact zone is a common feature in many species, and may be due to combinations of sex-biased dispersal asymmetries, incomplete mtDNA lineage sorting, adaptive introgression, demographic disparities between population groups [11], or gamete incompatibility. In Pacific herring, sex-biased dispersal or mating may be facilitated by size differences between residents and immigrants into the contact zone or by directional genetic incompatibilities between the groups. However, it is difficult to devise a model that would explain a microsatellite hybrid zone that is larger than the mtDNA contact zone in Pacific herring, as mtDNA haplotypes are more geographically restricted in the contact zone than are microsatellite markers. Incomplete mtDNA lineage sorting in the previously isolated regional groups is an unlikely explanation because haplotypes from the major phylogroups are not geographically widespread [11]. Another possibility is a large difference in population sizes of the two groups in the contact zone. If adaptive differences between NW and NE Pacific herring are strong, periodic shifts in ocean climate conditions in the central North Pacific [60] may produce a shifting dynamic in relative population abundances of the two groups within the contact zone that leads to different frequency shifts in

**Table 7.** AMOVAs of models of population structure based on frequencies at nine microsatellite loci in samples of Pacific herring.

| YS | SH | IB | NH | AK | WK | TO | SI | CW | $F_{CT}$ | $P$    | $F_{SC}$ | $P$    | $F_{ST}$ | $P$    |
|----|----|----|----|----|----|----|----|----|----------|--------|----------|--------|----------|--------|
| [* | *  | *  | *  | *  | *  | *  | *  | *  | 0.073    | <0.001 | –        | –      | –        | –      |
| [* | *  | *  | *  | *  | *  | *  | [* | [* | 0.023    | 0.113  | 0.065    | <0.001 | 0.086    | <0.001 |
| [* | *  | *  | *  | *  | *  | [* | [* | [* | 0.057    | 0.012  | 0.045    | <0.001 | 0.100    | <0.001 |
| [* | *  | *  | *  | *  | *  | [* | [* | [* | 0.046    | 0.004  | 0.048    | <0.001 | 0.092    | <0.001 |
| –  | –  | –  | –  | –  | –  | [* | [* | [* | 0.007    | 0.332  | 0.018    | 0.006  | 0.025    | <0.001 |
| [* | *  | *  | *  | *  | *  | [* | –  | –  | 0.063    | 0.142  | 0.053    | <0.001 | 0.113    | <0.001 |
| [* | *  | *  | *  | *  | *  | –  | –  | –  | 0.053    | <0.001 | –        | –      | –        | –      |
| [* | *  | *  | *  | [* | [* | –  | –  | –  | –0.021   | 1.000  | 0.050    | <0.001 | 0.040    | <0.001 |
| [* | *  | *  | [* | [* | [* | –  | –  | –  | –0.008   | 0.735  | 0.053    | <0.001 | 0.050    | <0.001 |
| [* | *  | [* | [* | [* | [* | –  | –  | –  | –0.012   | 0.900  | 0.060    | <0.001 | 0.049    | <0.001 |
| [* | [* | [* | [* | [* | [* | –  | –  | –  | –0.001   | 0.535  | 0.057    | <0.001 | 0.053    | <0.001 |
| [* | [* | [* | [* | [* | [* | –  | –  | –  | 0.011    | 0.332  | 0.060    | <0.001 | 0.060    | <0.001 |

Location abbreviations as in Table 1.  
doi:10.1371/journal.pone.0050340.t007

the markers [11]. Lastly, divergence between gamete surface proteins may play a role in reproductive incompatibilities, as in some other marine organisms [61–63].

In conclusion, Pacific herring are characterized by two parapatric genetically distinct groups that are in secondary contact after divergence in isolation during glacial maxima. Allozyme and mtDNA markers generally show genetic homogeneity among ocean-type populations within regions that has been interpreted to indicate significant amounts of gene flow between populations [13–15]. The occurrence of out-of-basin mtDNA markers is consistent with long distance dispersals. Microsatellite markers, on the other hand, tend to show more structure that reflects isolation in fjords and adaptive differences between populations. These contemporary restrictions on gene flow typically produce a broad signal of isolation by distance in microsatellites that still indicates substantial gene flow between local populations, perhaps due in part to decadal shifts in population abundances and distributions. These results together contrast with the sharp genetic discontinuity across the Bering Sea and Gulf of Alaska and point to competitive exclusion, mating incompatibilities, or hybrid inferiority as mechanisms maintaining the discontinuity between the two major groups of Pacific herring.

## References

- Maggs CA, Castilho R, Foltz D, Henzler C, Jolly MT, et al. (2008) Evaluating signatures of glacial refugia for North Atlantic Benthic marine taxa. *Ecology* 89: S108–S122.
- Riginos D, Nachman MW (2001) Population subdivision in marine environments: the contributions of biogeography, geographical distance and discontinuous habitat to genetic differentiation in a blennioid fish, *Axoclinus nigricaudus*. *Mol Ecol* 10: 1439–1453.
- Patarnello T, Volckaert FAMJ, Castilho R (2007) Pillars of Hercules: is the Atlantic-Mediterranean transition a phylogeographical break? *Mol Ecol* 16: 4426–4444.
- Galindo HM, Olson DB, Palumbi SR (2006) Seascape genetics: a coupled oceanographic-genetic model predicts population structure of Caribbean corals. *Curr Biol* 16: 1622–1626.
- Jørgensen HBH, Hansen MM, Bekkevold D, Ruzzante DE, Loeschke V (2005) Marine landscapes and population genetic structure of herring (*Clupea harengus* L.) in the Baltic Sea. *Mol Ecol* 14: 3219–3234.
- Cowen RK, Sponaugle S (2009) Larval dispersal and marine population connectivity. *Ann Rev Mar Sci* 1: 443–466.
- Small MP, Loxterman JL, Frye AE, Von Bargen JF, Bowman C, et al. (2005) Temporal and spatial genetic structure among some Pacific herring populations in Puget Sound and the southern Strait of Georgia. *Trans Am Fish Soc* 134: 1329–1341.
- Reeb CA, Avise JC (1990) A genetic discontinuity in a continuously distributed species: mitochondrial DNA in the American oyster, *Crassostrea virginica*. *Genetics* 124: 397–406.
- Neiva J, Pearson GA, Valero M, Serrão SA (2012) Fine-scale genetic breaks driven by historical range dynamics and ongoing density-barrier effects in the estuarine seaweed *Fucus ceranoides* L. *BMC Evol Biol* 12: 78.
- Roman J, Palumbi SR (2004) A global invader at home: population structure of the green crab, *Carcinus maenas*, in Europe. *Mol Ecol* 13: 2891–2898.
- Toews DPL, Breltsford A (2012) The biogeography of mitochondrial and nuclear discordance in animals. *Mol Ecol* 21: 3907–3930.
- Waters JM (2011) Competitive exclusion: phylogeography's 'elephant in the room'? *Mol Ecol* 20: 4388–4394.
- Grant WS, Utter FM (1984) Biochemical population genetics of Pacific herring (*Clupea pallasii*). *Can J Fish Aquat Sci* 41: 856–864.
- Kobayashi T (1993) Biochemical analyses of genetic variability and divergence of populations in Pacific herring (*Clupea pallasii*). *Bull Nat Res Inst Far Seas Fish* 30: 1–77. [Japanese: English abstract].
- Liu JX, Tataronov A, Beacham TD, Gorbachev V, Wildes S, et al. (2011) Effects of Pleistocene climate fluctuations on the phylogeographic and demographic histories of Pacific herring (*Clupea pallasii*). *Mol Ecol* 20: 3879–3893.
- Grant WS, Liu M, Gao TX, Yanagimoto T (2012) Limits of Bayesian skyline plot analysis of mtDNA sequences to infer historical demographics in Pacific herring (and other species). *Mol Phylogenet Evol* 65: 203–212.
- Beacham TD, Schweigert JF, MacConnachie C, Le KD, Flostrand L (2008) Use of microsatellites to determine population structure and migration of Pacific herring in British Columbia and adjacent regions. *Trans Am Fish Soc* 137: 1795–1811.
- O'Connell M, Dillon MC, Wright JM, Bentzen P, Merkouris S, et al. (1998) Genetic structuring among Alaskan Pacific herring populations identified using microsatellite variation. *J Fish Biol* 53: 150–163.
- Wildes SL, Vollenweider JJ, Nguyen HT, Guyon JR (2011) Genetic variation between outer-coastal and fjord populations of Pacific herring (*Clupea pallasii*) in the eastern Gulf of Alaska. *Fish Bull* 109: 382–393.
- Hay DE, Rose KA, Schweigert J, Megrey BA (2008) Geographic variation in North Pacific herring populations: Pan-Pacific comparisons and implications for climate change impacts. *Prog Oceanogr* 77: 233–240.
- Sambrook J, Fritsch EF, Maniatis T (1989) *Molecular cloning: a laboratory manual*, 2nd ed. Cold Spring Harbor Laboratory, Cold Spring Harbor, NY.
- Liu JX, Gao TX, Wu SF, Zhang YP (2007) Pleistocene isolation in the Northwestern Pacific marginal seas and limited dispersal in a marine fish, *Chelon haemotocheilus* (Temminck and Schlegel, 1845). *Mol Ecol* 16: 275–288.
- Olson JB, Lewis CJ, Kretschmer EJ, Wilson SL, Seeb JE (2002) Characterization of 14 tetranucleotide microsatellite loci derived from Pacific herring. *Mol Ecol Resour* 2: 101–103.
- Bassam BJ, Caetano-Anollés G, Gresshoff PM (1991) Fast and sensitive silver staining of DNA in polyacrylamide gels. *Anal Biochem* 196: 80–83.
- Jiang X, Yang GP, Liao MJ, Liu Y, Gao TX, et al. (2007) Microsatellite DNA polymorphism of Japanese sea bass (*Lateolabrax japonicus*) inhabiting Chinese and Japanese coasts. *J Appl Ichthyol* 24: 180–186.
- Excoffier L, Laval G, Schneider S (2005) Arlequin (version 3.0): an integrated software package for population genetics data analysis. *Evol Bioinform* 1: 47–50.
- Posada D, Crandall KA (1998) Modeltest: testing the model of DNA substitution. *Bioinform* 14: 817–818.
- Tamura K, Nei M (1993) Estimation of the number of nucleotide substitutions in the control region of mitochondrial DNA in humans and chimpanzees. *Mol Biol Evol* 10: 512–526.
- Clement M, Posada D, Crandall KA (2000) TCS: a computer program to estimate gene genealogies. *Mol Ecol* 9: 1657–1659.
- Excoffier L, Smouse P, Quattro J (1992) Analysis of molecular variance inferred from metric distances among DNA haplotypes: application to human mitochondrial DNA restriction data. *Genetics* 131: 479–491.
- Fu YX (1997) Statistical tests of neutrality of mutations against population growth, hitchhiking and background selection. *Genetics* 147: 915–925.
- Excoffier L (2004) Patterns of DNA sequence diversity and genetic structure after a range expansion: lessons from the infinite-island model. *Mol Ecol* 13: 853–864.
- Rogers AR, Harpending H (1992) Population growth makes waves in the distribution of pairwise differences. *Mol Biol Evol* 9: 552–569.
- Ray N, Currat M, Excoffier L (2003) Intra-deme molecular diversity in spatially expanding populations. *Mol Biol Evol* 20: 76–86.
- Rousset F (1997) Genetic differentiation and estimation of gene flow from *F*-statistics under isolation by distance. *Genetics* 145: 1219–1228.
- Jensen JL, Bohonak AJ, Kelley ST (2005) Isolation by distance, web service. *BMC Genetics* 6: 13. v.3.23 <http://ibdws.sdsu.edu/>. Accessed 2012 March 25.
- Yeh FC, Yang RC, Boyle T (1999) POPGENE, version 1.32: the user friendly software for population genetic analysis. Molecular Biology and Biotechnology Centre, University of Alberta, Edmonton, AB, Canada.

## Supporting Information

### Table S1 Haplotypes distribution of the three lineages in the ten populations.

(DOCX)

### Table S2 Levels of genetic variability at ten microsatellite loci in the nine populations of Pacific herring and for all populations pooled.

(DOCX)

## Acknowledgments

The present study could not be carried out without Mr. XJ. Zhang, Dr. T. Shimura, and Mr. J. Bauer, who helped in collecting the samples of Pacific herring for this study. Dr. L. Hauser and M. Grant provided useful comments on earlier versions of the manuscript. The Alaska Department of Fish and Game supported WSG during the preparation of the manuscript.

## Author Contributions

Conceived and designed the experiments: TXG YS ML. Performed the experiments: ML LSL TY. Analyzed the data: ML WSG. Contributed reagents/materials/analysis tools: LSL YS TY. Wrote the paper: WSG ML.

38. Rousset F (2008) GENEPOP '007: a complete re-implementation of the GENEPOP software for Windows and Linux. *Mol Ecol Resour* 8: 103–106.
39. Pritchard JK, Stephens M, Donnelly P (2000) Inference on population structure using multilocus genotype data. *Genetics* 155: 945–959.
40. Evanno G, Regnaut S, Goudet J (2005) Detecting the number of clusters of individuals using the software STRUCTURE: a simulation study. *Mol Ecol* 14: 2611–2620.
41. Ryman N, Palm S, André C, Carvalho GR, Dahlgren TG, et al. (2006) Power for detecting genetic divergence: differences between statistical methods and marker loci. *Mol Ecol* 15: 2031–2045.
42. Slatkin M (1993) Isolation by distance in equilibrium and non-equilibrium populations. *Evolution* 47: 264–279.
43. Akaike S, Takahashi K, Hoshikawa H, Takiya A, Tsuda F, et al. (2010) Distribution and abundance of the Ishikari Bay herring (*Clupea pallasii*) natural spawning beds and the seaweed beds on the northwestern coast of Hokkaido. *Sci Reps Hokk Fish Exp Sta* 77: 29–33. [Japanese with English abstract].
44. Hay DE (1985) Reproductive biology of Pacific herring (*Clupea harengus pallasii*). *Can J Fish Aquat Sci* 42: 111–126.
45. Tojo N, Kruse GH, Funk FC (2007) Migration dynamics of Pacific herring (*Clupea pallasii*) and response to spring environmental variability in the southeastern Bering Sea. *Deep Sea Res II* 54: 2832–2848.
46. Kanno Y (1989). Variations in meristic and morphometric characters among populations of herring *Clupea pallasii* in the far eastern waters. *Bull Jap Soc Sci Fish* 55: 431–439.
47. Hotta T, Matsuishi T, Sakano H, Kanno Y (1999) Population structure of Pacific herring *Clupea pallasii* in the eastern Hokkaido waters. *Nip Sui Gakk* 65: 655–660.
48. Yamane K, Shirai K, Nagakura Y, Yamaguchi M, Takiya A, et al. (2010) Spatial variation in otolith elemental composition of the Pacific herring *Clupea pallasii* in northern Japan. *Aquat Biol* 10: 283–290.
49. Zebdi A, Collie JS (1995) Effect of climate on herring (*Clupea pallasii*) population dynamics in the Northeast Pacific Ocean, in: Beamish, RJ, editor. *Climate change and northern fish populations*. *Can Spec Pubs Fish Aquat Sci* 121: 277–290.
50. Nagasawa K (2001) Long-term variation in abundance of Pacific herring (*Clupea pallasii*) in Hokkaido and Sakhalin related to changes in environmental conditions. *Prog Oceanogr* 49: 551–564.
51. Liu M, Gao TX, Sakurai Y, Jia N, Zhao LL, et al. (2011) Mitochondrial DNA control region diversity and population structure of Pacific herring (*Clupea pallasii*) in the Yellow Sea and Sea of Japan. *Chin J Oceanol Limnol* 29: 317–325.
52. Johannesson K, André C (2006) Life on the margin: genetic isolation and diversity loss in a peripheral marine ecosystem, the Baltic Sea. *Mol Ecol* 15: 2013–2029.
53. Eckert CG, Samis KE, Loughheed SC (2008) Genetic variation across species' geographical ranges: the central-marginal hypothesis and beyond. *Mol Ecol* 17: 1170–1188.
54. Sancetta C (1983) Effect of Pleistocene glaciation upon oceanographic characteristics of the North Pacific Ocean and Bering Sea. *Deep-Sea Res* 30: 851–869.
55. Mann DH, Hamilton TD (1995) Late Pleistocene and Holocene paleoenvironments of the North Pacific coast. *Quat Sci Revs* 14: 449–471.
56. Harrison PJ, Boyd PW, Vaela DE, Takeda S, Shiimoto A, et al. (1999) Comparison of factors controlling phytoplankton productivity in the NE and NW subarctic Pacific gyres. *Prog Oceanogr* 43: 205–234.
57. Gorbarenko SA, Southon JR (2000) Detailed Japan Sea paleoceanography during the last 25 kyr: constraints from AMS dating and  $\delta^{18}O$  of planktonic foraminifera. *Palaeogeogr Palaeoclim Palaeoecol* 156: 177–193.
58. Payne MC, Brown CA, Reusser DA, Lee H II (2012) Ecoregional analysis of nearshore sea-surface temperature in the North Pacific. *PLoS One* 7(1): e30105.
59. Zarraonaindia I, Iriondo M, Albaina A, Pardo MA, Manzano C, et al. (2012) Multiple SNP markers reveal fine-scale population and deep phylogeographic structure in European anchovy (*Engraulis encrasicolus* L.). *PLoS One* 7(7): e42201.
60. Mantua NJ, Hare SR (2002) The Pacific Decadal Oscillation. *J Oceanogr* 58: 35–44.
61. Swanson WJ, Vacquier VD (2002) The rapid evolution of reproductive proteins. *Nat Revs* 3: 137–144.
62. Springer SA, Crespi BJ (2007) Adaptive gamete-recognition divergence in a hybridizing *Mytilus* population. *Evolution* 61: 772–783.
63. Binks RM, Prince J, Evans JP, Kennington WJ (2012) More than binding divergence: reproductive isolation between sympatric subspecies of a sea urchin by asynchronous spawning. *Evolution* 66: 3545–3557.
